# Supplementary material
Source: PubMed Central journal article supplement (PMC6018696)
Supplement: 41396_2018_71_MOESM1_ESM.pdf [file 41396_2018_71_MOESM1_ESM.pdf]

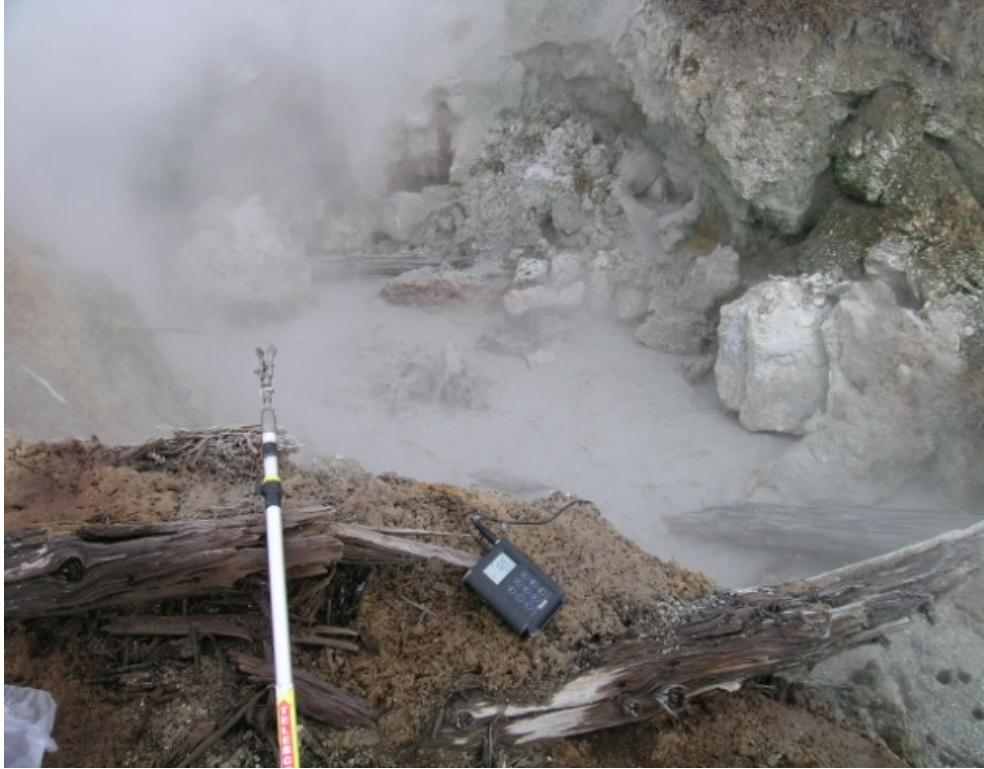

**Supplemental Figure 1.** Picture of the Yellowstone National Park NL01 hot spring from which cells were collected.
