# Supplementary material
Source: PubMed Central journal article supplement (PMC6018696)
Supplement: 41396_2018_71_MOESM2_ESM.pdf [file 41396_2018_71_MOESM2_ESM.pdf]

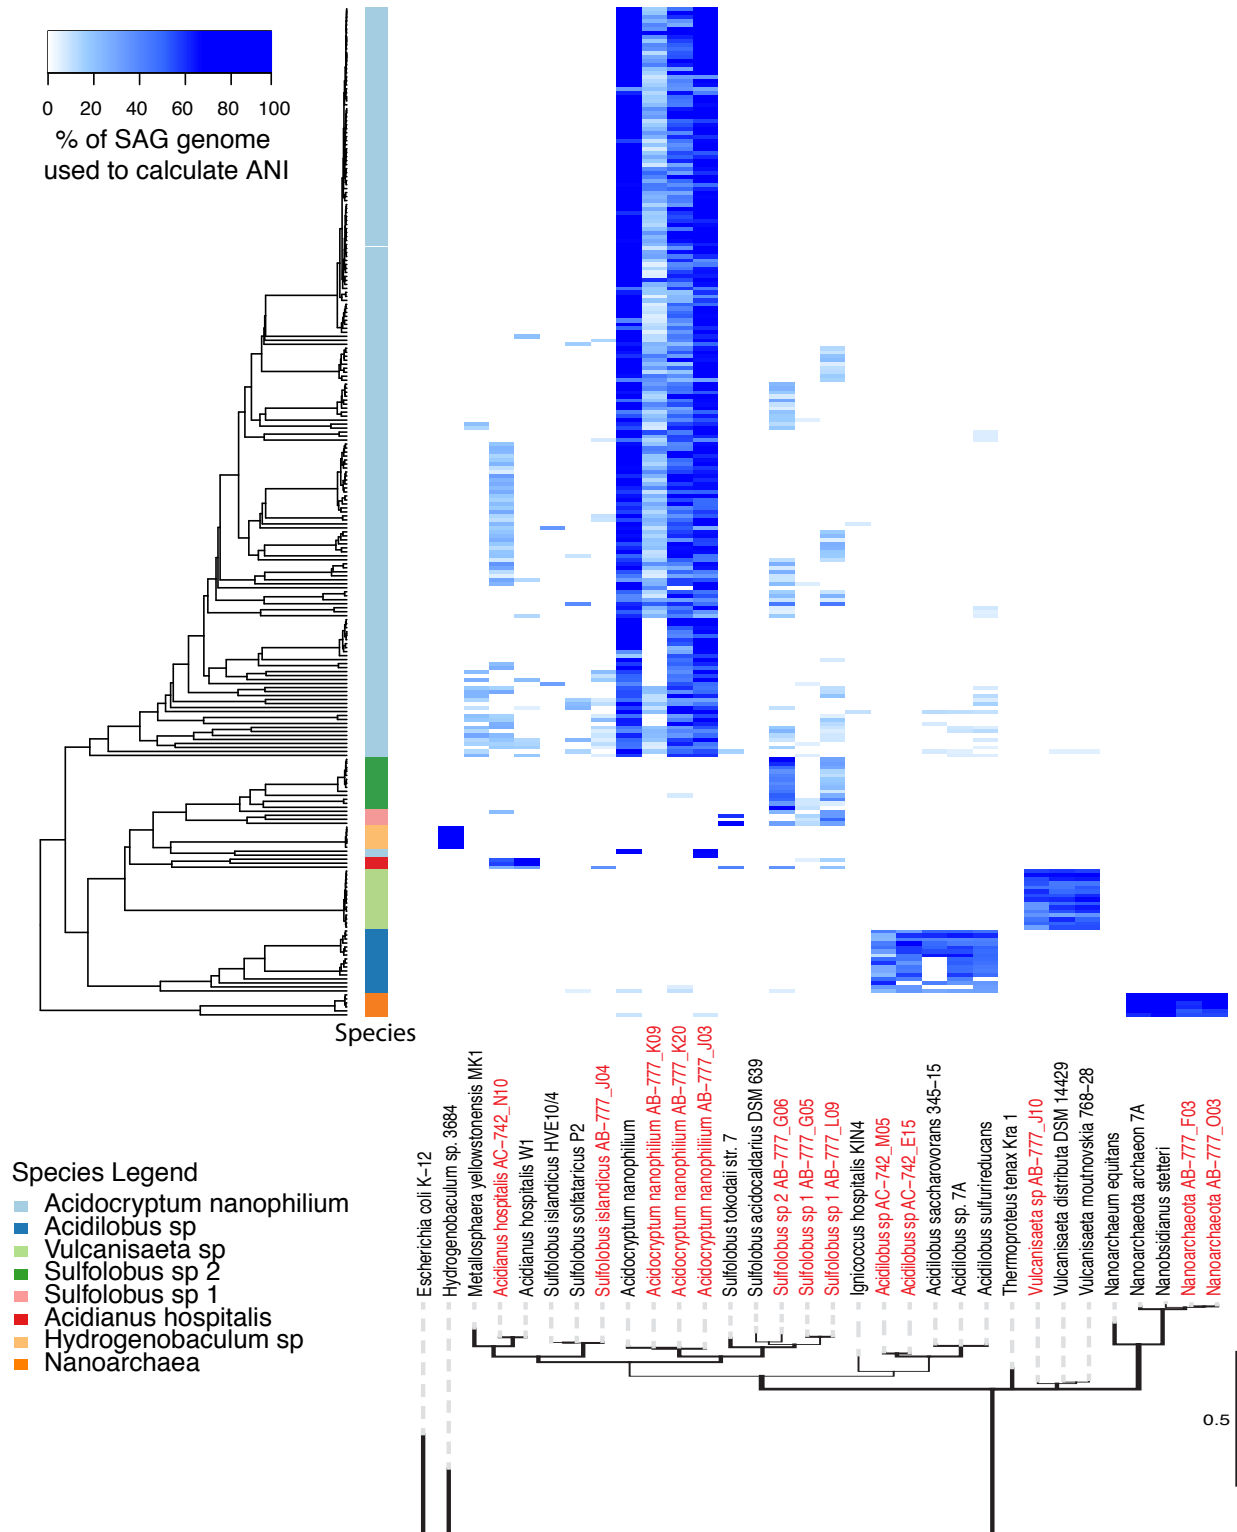

**Supplemental Figure 2.** Heatmap of the percent of the SAG genome used to calculate ANI for all classified SAGs against 32 reference genomes. SAGs are in the same order as Figure 1. Matches where less than 5% of the SAG genome was used were removed as were matches with a corresponding ANI <70%.
