# Supplementary material
Source: PubMed Central journal article supplement (PMC6018696)
Supplement: 41396_2018_71_MOESM3_ESM.pdf [file 41396_2018_71_MOESM3_ESM.pdf]

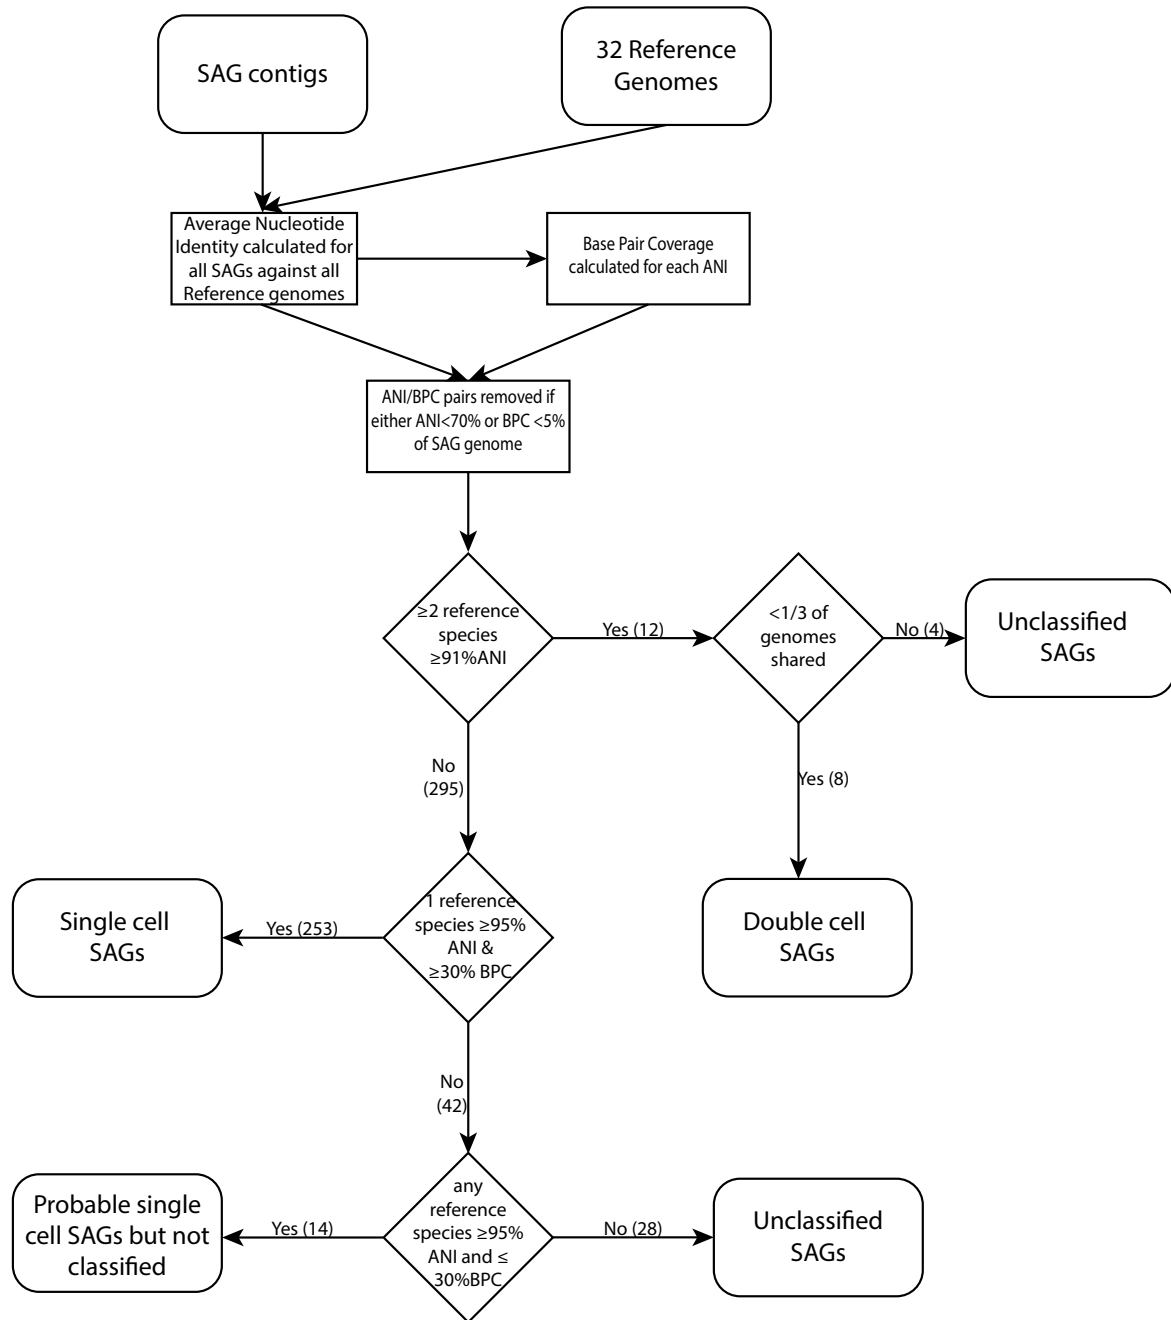

**Supplemental Figure 3.** Schematic overview of the logic pipeline used to classify single amplified genomes (SAG). The average nucleotide identity (ANI) was calculated using the script provided here (<https://github.com/chjp/ANI>) and the base pair coverage (BPC) was calculated using a custom perl script. Numbers in parenthesis indicate the number of SAGs at each step of the pipeline.
